# Supplementary material
Source: MDPI journal article supplement (https://www.mdpi.com/2073-4441/16/9/1277)

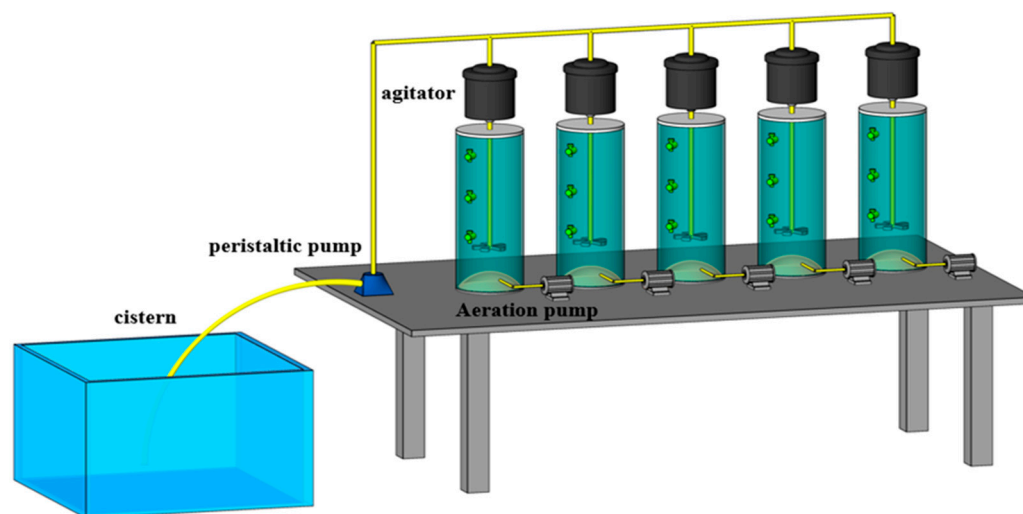

Figure S1 Diagram of the experimental setup.

Supplement: s1 [file s1]
